# Supplementary material for: A J-Like Protein Influences Fatty Acid Composition of Chloroplast Lipids in Arabidopsis
Source: PubMed Central journal article supplement (PMC3196505; doi:10.1371/journal.pone.0025368), 2011-10-18
Supplement: pone.0025368.s001.pdf [file pone.0025368.s001.pdf]

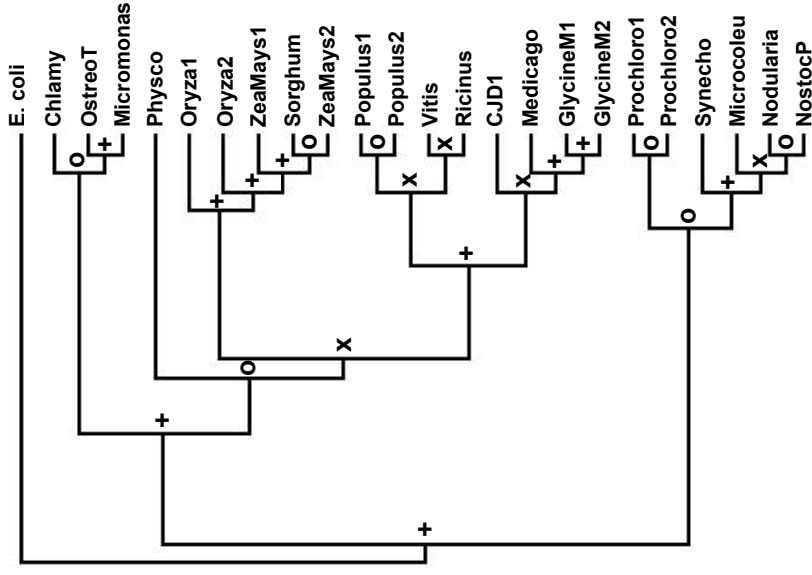

**Figure S1. Rooted tree indicating the relatedness of predicted CJD1 protein homologues in representative organisms.** The *E. coli* DNAJ protein was used as an outgroup. Boot strapping values >900 are marked by a plus sign, those between 500 and 900 are marked with an open circle and those under 500 by a cross. Protein sequences in addition to those already described in Figure 2 (GenBank Protein ID): *E. coli*, *Escherichia coli*, 16128009; *Micromonas*, *Micromonas pusilla* (RCC299), 255073349; *Physco*, *Physcomitrella patens*, 162675779; *Oryza2*, *Oryza sativa*, 113622873; *Populus2*, *Populus trichocarpa*, 224123536; *Sorghum*, *Sorghum bicolor*, 242080423; *Ricinus*, *Ricinus communis*, 255561927; *Medicago*, *Medicago truncatula*, 217075548; *GlycineM1*, *Glycine max*, 255638094; *Prochloro2*, *Prochlorococcus marinus* (MIT9515), 123200338; *Microcoleu*, *Microcoleus chthonoplastes* (PCC7420), 254411043; *Nodularia*, *Nodularia spumigena* (CCY9414), 119513416; *NostocP*, *Nostoc punctiforme* (PCC7312), 186684227. Locus identifiers for *ZeaMays2* and *GlycineM2* are GRMZM2G050118 and Glyma03g41110, respectively.
