# Supplementary material for: A J-Like Protein Influences Fatty Acid Composition of Chloroplast Lipids in Arabidopsis
Source: PubMed Central journal article supplement (PMC3196505; doi:10.1371/journal.pone.0025368), 2011-10-18
Supplement: pone.0025368.s002.pdf [file pone.0025368.s002.pdf]

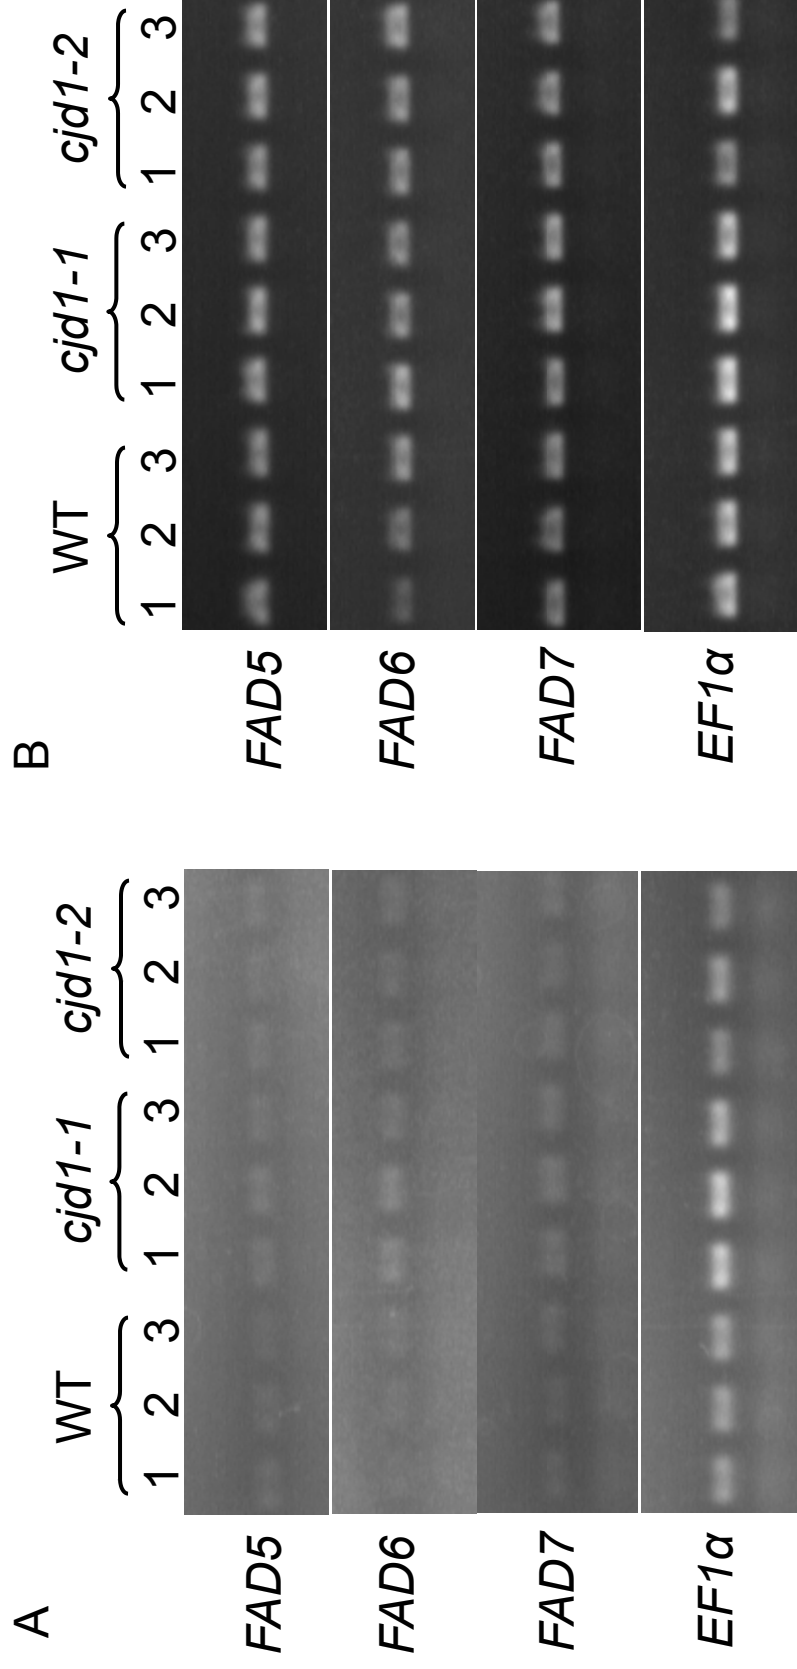

**Figure S2. Steady-state transcript abundance of *FAD5*, *FAD6*, *FAD7* and *EF1 $\alpha$*  in wild-type (WT), *cjd1-1* and *cjd1-2* plants. A, 25 and B, 30 cycles into the RT-PCR analysis. Three biological replicates (1,2,3) were tested.**
