# Supplementary material for: A J-Like Protein Influences Fatty Acid Composition of Chloroplast Lipids in Arabidopsis
Source: PubMed Central journal article supplement (PMC3196505; doi:10.1371/journal.pone.0025368), 2011-10-18
Supplement: pone.0025368.s003.pdf [file pone.0025368.s003.pdf]

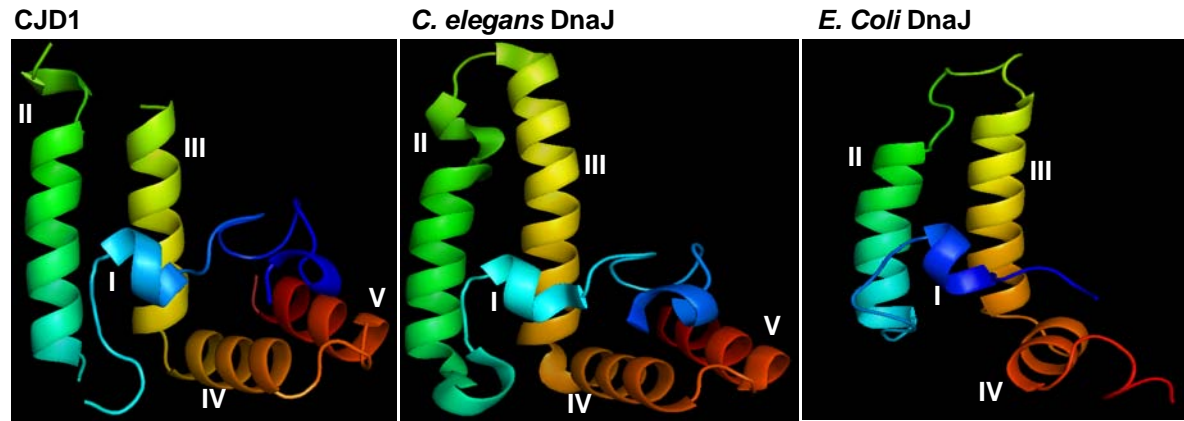

**Figure S3. CJD1<sub>(60-151)</sub> homology model.** The model is based on an alignment between CJD1<sub>(60-151)</sub> and the J domain of the *C. elegans* DnaJ homologue, dnj-2. PyMol software was utilized to create the images. N-termini are displayed in blue while C-termini are colored red.
