# Supplementary material for: A J-Like Protein Influences Fatty Acid Composition of Chloroplast Lipids in Arabidopsis
Source: PubMed Central journal article supplement (PMC3196505; doi:10.1371/journal.pone.0025368), 2011-10-18
Supplement: pone.0025368.s006.pdf [file pone.0025368.s006.pdf]

**Table S1****Segregation analysis of the chloroplast morphology phenotype found in *cjdl-2***

| Plant | Genotype | Chloroplast Morphology |
|-------|----------|------------------------|
| 1     | Homo     | -                      |
| 2     | WT       | +                      |
| 3     | Homo     | -                      |
| 4     | Het      | -                      |
| 5     | Homo     | -                      |
| 6     | WT       | +                      |
| 7     | WT       | +                      |
| 8     | WT       | -                      |
| 9     | Homo     | -                      |
| 10    | Het      | -                      |
| 11    | Homo     | +                      |
| 12    | WT       | -                      |
| 13    | Homo     | -                      |
| 14    | WT       | -                      |
| 15    | Het      | -                      |
| 16    | Het      | -                      |
| 17    | Homo     | -                      |
| 18    | WT       | -                      |
| 19    | WT       | +                      |
| 20    | WT       | -                      |
| 21    | Het      | -                      |
| 22    | Homo     | -                      |
| 23    | Het      | +                      |
| 24    | WT       | -                      |
| 25    | Het      | -                      |
| 26    | Het      | -                      |
| 27    | Het      | -                      |
| 28    | Het      | -                      |
| 29    | Homo     | +                      |
| 30    | WT       | -                      |
| 31    | Het      | -                      |
| 32    | Het      | -                      |
| 33    | Het      | +                      |
| 34    | Het      | +                      |

Homo/Het, homozygous or heterozygous for *cjdl-2* T-DNA, respectively. WT, *cjdl-2* T-DNA was not detected by PCR. +/- Presence or absence of abnormal chloroplasts, respectively.
